## Title page

### Title

Subacute effects of the psychedelic ayahuasca on the salience and default mode networks

### Authors

Lorenzo Pasquini PhD<sup>1\*</sup>, Fernanda Palhano-Fontes PhD<sup>2\*</sup>, Draulio B. Araujo PhD<sup>2</sup>

### Affiliations

1 University of California San Francisco Memory and Aging Center, University of California San Francisco, San Francisco, California

2 Brain Institute, Federal University of Rio Grande do Norte (UFRN), Natal-RN, Brazil

\* These authors contributed equally to the manuscript

### Corresponding author:

Draulio B. Araujo

Brain Institute (UFRN)

Av. Nascimento Castro, 2155

Natal, RN 59056 - Brazil

[draulio@neuro.ufrn.br](mailto:draulio@neuro.ufrn.br)

**Running title:** Subacute effects of ayahuasca on brain networks

**Keywords:** Ayahuasca, default mode network, functional connectivity, interoception, salience network, psychedelics.

## Abstract

**Background:** Recent years have seen a growing interest in the therapeutic use of psychedelic substances for the treatment of anxiety and depression in patients with affective and mood disorders. Neuroimaging studies have just begun to explore how brain networks supporting perceptual and higher-order cognitive and emotional functions are affected during the acute effects of psychedelics. Even less is known on the neural correlates of the subacute effects taking place one to a few days after the psychedelic experience. This study explores the subacute changes of primary sensory brain networks and networks supporting higher-order affective and self-referential functions after a single session with the psychedelic ayahuasca.

**Methods:** We leveraged task-free functional magnetic resonance imaging data one day before and one day after a randomized placebo-controlled trial exploring the effects of ayahuasca in naïve healthy participants (21 placebo/22 ayahuasca). We derived functional connectivity maps of the salience, default mode, visual and sensorimotor networks using a seed-to-whole brain connectivity approach, and statistically assessed post-session functional connectivity changes between the ayahuasca and placebo groups. Connectivity changes were subsequently associated with scores of the Hallucinogen Rating Scale assessed during the acute session.

**Results:** Our findings revealed increased functional connectivity in the anterior cingulate cortex of the salience network and decreased functional connectivity in the posterior cingulate cortex of the default mode network one day after the session in the ayahuasca group. No connectivity changes between groups were found in primary sensory networks. Subacute increased connectivity of the salience network correlated positively with altered somesthesia scores assessed during the acute effects of ayahuasca, while decreased connectivity of the default mode network correlated negatively with altered volition scores.

**Conclusion:** These findings provide preliminary evidence for subacute functional changes induced by the psychedelic ayahuasca on higher-order cognitive brain networks known to support interoceptive, affective, and self-referential processes.

## Introduction

Classic psychedelics belong to a family of substances that lead to altered states of consciousness, with a broad range of effects on sensory, cognitive, autonomic, interoceptive, self-referential, and emotional systems (Nichols, 2016). Assisted sessions with psychedelic substances such as ayahuasca and psilocybin have recently gained prominent use for the treatment of affective and mood disorders (Carhart-Harris, Bolstridge, et al., 2016; Griffiths et al., 2016; Grob et al., 2011; Osório et al., 2015; Palhano-Fontes et al., 2019; Ross et al., 2016; Sanches et al., 2016).

Ayahuasca is an indigenous preparation that contains leaves of *Psychotria viridis* and the bark of *Banisteriopsis caapi*, two plants vastly found in the Amazon (Mckenna et al., 1984). The admixture contains the psychedelic tryptamine N,N-dimethyltryptamine (N,N-DMT) and monoamine oxidase inhibitors, which has a particularly high affinity to serotonin and sigma-1 receptors (Barker, 2018; Fontanilla et al., 2009; Mckenna et al., 1984; Riba, Rodríguez-Fornells, et al., 2001). Recent clinical trials have explored the antidepressant effects of ayahuasca (Osório et al., 2015; Palhano-Fontes et al., 2019; Sanches et al., 2016). In an open-label trial, 17 patients with treatment-resistant depression were submitted to a single session with ayahuasca. Significant antidepressant effects were observed one day after the session and persisted for 21 days (Osório et al., 2015; Sanches et al., 2016). Consistent results were found in a separate randomized placebo-controlled trial, where a significant rapid antidepressant effect of ayahuasca was observed already one day after the session, compared to placebo (Palhano-Fontes et al., 2019). Yet, little is known about the underlying mechanisms by which ayahuasca may modulate affect, mood, and internal representations of oneself.

Neuroimaging techniques provide a powerful tool to explore brain changes elicited by psychedelic agents (Dos Santos et al., 2016). Task-free functional magnetic resonance imaging (tf-fMRI) measures synchronous, low frequency (<0.1 Hz) fluctuations in blood oxygen level-dependent (BOLD) activity among distant gray matter regions (Allen et al., 2011; Fox et al.,

2005; Smith et al., 2009) and has been used to delineate distinct intrinsic large-scale brain networks supporting primary sensory and higher cognitive and emotional functions (Fox et al., 2005; Grayson and Fair, 2017; Smith et al., 2009; van den Heuvel and Hulshoff Pol, 2010). Importantly, human emotions and social behavior are modulated by a distributed set of brain regions including the anterior cingulate cortex, bilateral anterior insula, and subcortical and limbic structures that regulate affect, interoception, and self-awareness by interacting with the autonomic nervous system (Craig, 2009; Critchley and Harrison, 2013; Zhou and Seeley, 2014). These regions coactivate and are structurally connected, cohesively forming the salience network, a large-scale brain system involved in homeostatic behavioral guidance and supporting socioemotional functions by integrating visceral and sensory information (Rankin et al., 2006; Seeley et al., 2007; Sturm, Brown, et al., 2018; Uddin, 2015). A second prominent large-scale brain system is the default mode network, which is primarily composed of the posterior cingulate cortex, precuneus, inferior parietal lobe, parahippocampal gyrus, and medial prefrontal cortex (Buckner et al., 2008). This network has been repeatedly associated with self-referential processes such as mind-wandering, introspection, and memory retrieval under healthy and pathological conditions (Buckner et al., 2008; Raichle et al., 2001).

Recent neuroimaging studies have explored the acute effects of psychedelics on human brain network functional organization (Carhart-Harris et al., 2012; Carhart-Harris, Muthukumaraswamy, et al., 2016; Palhano-Fontes et al., 2015; Roseman et al., 2014; Viol et al., 2017, 2019), with reports of increased functional integration at the global brain level (Petri et al., 2014; Tagliazucchi et al., 2016; Viol et al., 2017), and connectivity increases primarily affecting the primary visual cortex and frontal areas (Carhart-Harris, Muthukumaraswamy, et al., 2016; De Araujo et al., 2012). Only one study has reported salience network connectivity decreases under acute conditions (Lebedev et al., 2015), while most studies report decreased connectivity in important hubs of the default mode network, such as the posterior cingulate gyrus (Carhart-Harris et al., 2012; Lebedev et al., 2015; Palhano-Fontes et al., 2015).

A recent study assessing the subacute effect of ayahuasca reported decreased negative connectivity between the anterior cingulate cortex, a salience network hub, and key default mode network regions such as the posterior cingulate cortex and medial temporal lobes, whereas connectivity changes correlated with increased self-compassion scores (Sampedro et al., 2017). Likewise, the subacute effects of psilocybin in patients with treatment-resistant depression led to increased connectivity one day after dosing, which correlated with decreased depressive symptoms (Carhart-Harris et al., 2017). Little is known, however, on within-network subacute changes induced by ayahuasca on the salience and default mode networks on naïve healthy participants hours to days after a psychedelic session, and how functional changes may relate to the altered state of consciousness elicited by the psychedelic experience.

To address this critical gap, we leveraged tf-fMRI data assessed before and 24 hours after a randomized placebo-controlled trial exploring the subacute effects of ayahuasca in naïve healthy participants. We hypothesized subacute effects of ayahuasca for higher-order affective and self-referential networks but not primary sensory networks and predicted that the former would relate to the acute effects of ayahuasca. We applied a seed-based connectivity approach to map the salience, default mode, visual, and sensorimotor networks and assess subacute functional connectivity changes one day after the session with ayahuasca compared to placebo.

## **Methods and Materials**

We recruited 50 participants from local media and the Internet. All individuals included in the study were cognitively and physically healthy and naïve to ayahuasca. The following exclusion criteria were adopted: (i) diagnosis of current clinical disease based on anamnesis, physical, and laboratory examination; (ii) pregnancy; (iii) history of neurological/psychiatric diseases; (iv) substance abuse; (v) restrictions to magnetic resonance imaging assessment. All procedures took place at the Onofre Lopes University Hospital (UFRN), Natal-RN, Brazil. The study was approved by the University Hospital Research Ethics Committee (# 579.479). All

subjects provided written informed consent before participation. The study was registered at <http://clinicaltrials.gov> (NCT02914769).

Half of the participants (n=25) received a single dose of 1 ml/kg of ayahuasca adjusted to contain 0.36 mg/kg of N,N-DMT and the other half (n=25) received 1 ml/kg of a placebo substance, designed to simulate organoleptic properties of ayahuasca, and to produce low to modest gastrointestinal distress (Palhano-Fontes et al., 2019). A single ayahuasca batch was used throughout the study. The batch was prepared and provided by a branch of the Barquinha church, Ji-Paraná, Brazil. Baseline tf-fMRI assessments occurred one day before dosing, and a second tf-fMRI assessment occurred 24h after dosing (Figure 1A).

To assess the acute psychedelic experience, we used the Hallucinogenic Rating Scale (HRS), which was initially designed to assess the psychedelic effects of N,N-DMT (Strassman et al., 1994). It is divided into six subscales: (i) intensity, which reflects the strength of the overall experience; (ii) somaesthesia, which assesses somatic effects including interoception, visceral, and tactile effects; (iii) affect, which assesses comfort, emotional, and affective changes; (iv) perception, which assesses visual, auditory, gustatory, and olfactory effects; (v) cognition, which assesses changes in thoughts; and (vi) volition, which is related to the subject's capacity to willfully interact with his/her 'self' (Riba, Rodri, et al., 2001; Strassman et al., 1994). We used the HRS version translated to Brazilian Portuguese (Mizumoto et al., 2011). Participants completed the HRS at the end of the dosing session (approximately 4h after ayahuasca or placebo ingestion).

*Neuroimaging data acquisition.* tf-fMRI scanning was performed on a 1.5 Tesla scanner (General Electric, HDxt). Functional MRI data were acquired using an EPI sequence with the following parameters: TR = 2000 ms; TE = 35 ms; flip angle = 60°; FOV = 24 cm; matrix = 64 x 64; slice thickness = 3 mm; gap = 0.3 mm; number of slices = 35; volumes = 213. T1-weighted images were also acquired using a FSPGR BRAVO sequence with the following parameters:

TR = 12.7 ms, TE = 5.3 ms, flip angle = 60°, FOV = 24 cm, matrix = 320 x 320; slice thickness = 1.0 mm; number of slices = 128.

*Neuroimaging data preprocessing.* The first three volumes were discarded to allow T1 saturation. Preprocessing steps were performed using CONN (<https://web.conn-toolbox.org/>) (Whitfield-Gabrieli and Nieto-Castanon, 2012) and included: head motion correction, slice timing correction, and spatial smoothing (6-mm FWHM Gaussian kernel). Functional images were coregistered to the subject's anatomical image, normalized into the Montreal Neurological Institute (MNI) template, and resampled to 2 mm<sup>3</sup> voxels. Motion artifact was examined using the Artifact Detection Toolbox (ART; [http://www.nitrc.org/projects/artifact\\_detect/](http://www.nitrc.org/projects/artifact_detect/)). Volumes were considered outliers if the global signal deviation was superior to five standard deviations from the mean signal or if the difference in frame displacement between two consecutive volumes exceeded 0.9 mm. Physiological and other spurious sources of noise were removed using the CompCor method (Behzadi et al., 2007). Residual head motion parameters (3 rotation and 3 translation parameters), outlier volumes, white matter, and cerebral spinal fluid signal were regressed out. Finally, a temporal band-pass filter of 0.01 Hz to 0.1 Hz was applied. After data quality check, three participants in the ayahuasca group and four in the placebo group were excluded due to excessive motion artifact (inter-frame translations greater than 3 mm, inter-frame rotations greater than 3 degrees) (Power et al., 2012; Satterthwaite et al., 2012).

For each subject, average BOLD activity time courses were extracted using bilateral regions-of-interest from the Brainnetome Atlas (seed numbers 187 and 188 for the anterior cingulate cortex, seed numbers 175 and 176 for the posterior cingulate cortex, seed numbers 203 and 204 for the occipital cortex, and seed numbers 59 and 60 for the precentral cortex, <http://atlas.brainnetome.org/>) (Fan et al., 2016). Salience, default mode, visual, and sensorimotor network functional connectivity maps were generated through voxel-wise regression analyses using the extracted time-series as regressors (Seeley et al., 2007). After visual inspection, baseline one-sample t-test maps derived from the seed-based approach were

spatially correlated with publicly available maps of the visual ( $R_{\text{seed}}=0.44$ ), sensorimotor ( $R_{\text{seed}}=0.49$ ), default mode ( $R_{\text{seed}}=0.69$ ) and salience networks ( $R_{\text{seed}}=0.64$ ) (Smith et al., 2009), and interactively compared to maps available on NeuroVault (<https://neurovault.org>) (Gorgolewski et al., 2015). To control for our method of choice, the seed-based approach, we replicated the analysis using group independent component analysis (ICA) implemented through the GIFT toolbox (<http://icatb.sourceforge.net>). Briefly, preprocessed tf-fMRI data of all subjects were decomposed into 20 spatially independent components within a group-ICA framework (Calhoun et al., 2001; Pasquini et al., 2015). Data were concatenated and reduced by two-step principal component analysis, followed by independent component estimation with the infomax-algorithm. This procedure results in a set of averaged group components, which are then back reconstructed into the subject's space. As in the seed-based approach, baseline one-sample t-test maps derived from the ICA-based approach were spatially correlated with publicly available maps of the default mode network ( $R_{\text{ICA}}=0.63$ ) (Buckner et al., 2008) and salience network ( $R_{\text{ICA}}=0.56$ ) (Smith et al., 2009).

*Statistical analyses.* Using individual brain network connectivity maps at baseline, a voxel-wise one-sample t-test was implemented in SPM12 (<https://www.fil.ion.ucl.ac.uk/spm/software/spm12/>) to assess significant functional connections to our seeds of choice ( $t=6.5$ , extent probability threshold of  $p<0.01$  FWE corrected, voxel-wise threshold of  $p<0.001$  FWE corrected for multiple comparisons; Figure 1B). These maps were used as masks for subsequent voxel-wise statistical analyses. Change maps of brain network functional connectivity were derived by individually subtracting the functional connectivity maps post-dosing from the ones at baseline. Voxel-wise two-sample t-tests were used to assess differences in brain network functional connectivity between placebo and ayahuasca. If not reported otherwise, all voxel-wise findings are reported at the joint cluster and extent probability thresholds of  $p<0.05$  and  $p<0.01$ .



Since the use of liberal statistical thresholds in neuroimaging studies has been recently shown to be prone to inflate false positives results (Eklund et al., 2016), we additionally assessed group differences in functional connectivity through nonparametric permutation tests as implemented using the FSL package Randomise (<https://fsl.fmrib.ox.ac.uk/fsl/fslwiki/Randomise>) (p<0.05 threshold-free cluster enhancement uncorrected and FWE corrected for multiple comparisons) (Smith and Nichols, 2009; Winkler et al., 2014). Two-sample t-tests were used to assess group differences in demographic variables, mean framewise head displacement, and HRS subscales (p<0.005 if not specified otherwise). Average functional connectivity changes were derived from clusters identified with the voxel-wise two-sample t-tests using a joint cluster and extent probability threshold of p<0.05 for the default mode network and a more stringent joint cluster and extent probability threshold of p<0.01 for the salience network. Partial correlation coefficients corrected for the difference in framewise head displacement between the second and first scan were used to associate averaged functional connectivity changes in clusters of brain networks with HRS subscale scores (p<0.05 if not specified otherwise).

## Results

Forty-three (43) ayahuasca naïve participants assigned either to ayahuasca (n = 22) or placebo (n = 21) passed our neuroimaging data quality check (Table 1). All participants were assessed with tf-fMRI one day before and one day after dosing (Figure 1A), and salience, default mode network, visual, and sensorimotor networks maps were individually derived by seeding bilateral regions-of-interest (Figure 1B, Supplementary Table S1). Participants were comparable in terms of age, gender distribution, and mean framewise head displacement at both scans (Table 1). We found significant between-group differences for all HRS subscales, with significant increases in the ayahuasca compared to the placebo group in levels of altered

somesthesia ( $p < 0.0005$ ), affect ( $p < 0.005$ ), perception ( $p < 0.0005$ ), cognition ( $p < 0.0005$ ), volition ( $p < 0.009$ ), and intensity ( $p < 0.0005$ ) (Table 2).

*Subacute salience and default mode connectivity changes.* We next explored differences in brain network functional connectivity between the ayahuasca and the placebo groups. A voxel-wise two-sample t-test revealed significant increased functional connectivity in the ayahuasca compared to the placebo group for the salience network ( $t = 1.3$ ; joint cluster and extent probability thresholds of  $p < 0.05$  and  $p < 0.01$ ) (Figure 2A red and yellow maps, Supplementary Table S2). Functional connectivity increases were located bilaterally within the anterior cingulate cortex and superior frontal gyrus, with a tendency towards the left hemisphere (Figure 2A first three brain slides and Supplementary Table S2). Conversely, we found default mode network functional connectivity decreases in the ayahuasca group compared to placebo, located within the posterior cingulate cortex (Figure 2C and Supplementary Table S2). Average levels of functional connectivity changes derived from the clusters identified in Figures 2A and C are schematized as box plots (Figure 2B and D).

Similar functional connectivity differences for the salience network and default mode network were also found when using nonparametric permutation-based tests (Supplementary Figure S1 and Supplementary Table S3). Furthermore, consistent with our seed-based findings, ICA revealed patterns of increased anterior cingulate cortex and superior frontal gyrus functional connectivity for the salience network ( $t = 1.7$ ; joint cluster and extent probability thresholds of  $p < 0.05$ , Supplementary Figure S2 A-B and Supplementary Table S4) and a trend in decreased posterior cingulate cortex functional connectivity of the default mode network in the ayahuasca group ( $t = 1.3$ ; joint cluster and extent probability thresholds of  $p < 0.1$ , Supplementary Figure S2 C-D and Supplementary Table S4). Finally, the functional connectivity of primary sensory networks (visual and sensorimotor) did not differ significantly between ayahuasca and placebo, suggesting some level of specificity of subacute functional changes elicited by ayahuasca on the salience and default mode networks.

*Ayahuasca induced subacute changes in functional connectivity correlate with acute alterations in somesthesia and volition.* Average functional connectivity changes were derived from the previously identified clusters in the salience network and default mode network. Partial correlation analyses corrected for the difference in framewise head displacement between the second and first scanning session revealed significant positive associations between increases in salience network functional connectivity and somesthesia in the ayahuasca group but not in the placebo group ( $PR_{aya}=0.55$ ,  $p<0.01$ ;  $PR_{pla}=0.01$ ,  $p=0.95$ ) (Figure 3). Positive trend correlations were found between increased salience network functional connectivity and affect in the ayahuasca group and volition in the placebo group (Supplementary Table S5). Subacute changes in default mode network functional connectivity showed a significant negative correlation only with volition in the ayahuasca group and a trend in placebo ( $PR_{aya}= -0.59$ ,  $p<0.005$ ;  $R_{pla}= -0.43$ ,  $p=0.06$ ) (Figure 3, Supplementary Table S5).

## Discussion

Neuroimaging techniques provide a unique opportunity to study the neural correlates of altered states of consciousness induced by psychedelic agents (Carhart-Harris et al., 2012; Carhart-Harris, Muthukumaraswamy, et al., 2016; De Araujo et al., 2012; Palhano-Fontes et al., 2015; Riba et al., 2004; Viol et al., 2017; Vollenweider et al., 1997). In this study, ayahuasca naïve participants were randomly assigned to a single session with either ayahuasca or placebo, and functional connectivity of different large-scale brain networks was assessed with tf-fMRI one day before and one day after the dosing session. We found salience network connectivity increases in the anterior cingulate cortex and superior frontal gyrus in ayahuasca compared to placebo, while default mode network connectivity was decreased in the posterior cingulate cortex in the ayahuasca group. Ayahuasca induced subacute functional connectivity increases in the salience network correlated with altered levels of somesthesia, which reflects somatic changes including interoceptive, visceral, and tactile effects induced by psychedelics

(Riba, Rodri, et al., 2001). Reduced default mode network connectivity correlated with altered levels of volition, proposed to reflect the subject's capacity to willfully interact with his/her 'self' during the psychedelic experience (Riba, Rodri, et al., 2001). Critically, no subacute differences were detected in primary sensory brain networks, suggesting specificity of the observed changes in the salience network and default mode network. Although little is known on the long-term functional impact of psychedelics on large-scale brain networks, these findings suggest that ayahuasca has sustained effects on neural systems supporting interoceptive and self-referential processes (Brewer et al., 2013; Craig, 2009; Critchley and Harrison, 2013; Raichle, 2015; Seeley et al., 2007; Uddin, 2015).

*Effects of psychedelic substances on the salience network and default mode network.*

N,N-DMT, one of the major constituents of ayahuasca, has high affinity to the 5HT<sub>2A</sub> serotonergic receptor (Barker, 2018), while other constituents such as harmine, harmaline and tetrahydroharmine act as MAO<sub>i</sub> and serotonin reuptake inhibitors partially by interacting with the serotonin transporter (5-HTT) (Mckenna et al., 1984; Riba, Rodríguez-Fornells, et al., 2001). A recent molecular neuroimaging study involving positron emission tomography acquired in a large sample of healthy individuals revealed *in vivo* multimodal density maps of serotonin transporter and major serotonin receptors in the human brain (Beliveau et al., 2017). 5HT<sub>2A</sub> receptors displayed a widespread pattern of distribution spanning the visual cortex, temporal, parietal and frontal regions overlapping with major hubs of the salience, default mode, and task-control networks (Buckner et al., 2008; Raichle et al., 2001; Seeley et al., 2007), with density of serotonin transporter being highest within frontotemporal regions overlapping with the insula and anterior cingulate cortex. Previous studies investigating psychedelics have reported decreased within salience network functional coupling during the acute effects of psilocybin (Lebedev et al., 2015). Psilocybin-induced reduced functional connectivity was associated with "ego-dissolution", a construct frequently reported as altered by psychedelics, characterized by the feeling that the border between one's self and the external world is dissolving (Goodman,

2002; Griffiths et al., 2011; Lyvers and Meester, 2012; Trichter et al., 2009). Similar studies have reported increased salience network entropy levels during the acute effects of LSD (Lebedev et al., 2016) and with ayahuasca (Viol et al., 2017). A study investigating the structural correlates of long-term ayahuasca use found increased cortical thickness within the anterior cingulate cortex (a region standing out throughout our analyses) of regular ayahuasca users compared to controls, while cortical thickness of default mode network regions such as the precuneus and posterior cingulate cortex was decreased in long-term ayahuasca users (Bouso et al., 2015). The salience network has been proposed to orchestrate dynamic switching between mentalizing states anchored on the default mode network and externally-driven attentional states anchored on the task-control network in order to guide behavior by segregating relevant internal and extrapersonal stimuli (Menon and Uddin, 2010; Uddin, 2015; Zhou and Seeley, 2014). Intriguingly, increased global coupling and functional connectivity between the salience and default mode network nodes have been found under acute psilocybin administration (Carhart-Harris et al., 2013) and subacutely with ayahuasca (Sampedro et al., 2017), but future work, ideally combining multimodal molecular and functional neuroimaging, is needed in order to elucidate how mid- and long-term functional interactions of both networks are changed by psychedelic agents.

*Impact of psychedelics on interoception, affect, and self-referential processes.*

Psychedelic substances modulate blood pressure, body temperature, and heart rate by interacting with the sympathetic and parasympathetic autonomic nervous system, and have shown to impact emotional and affective functions by improving clinical symptoms in mood disorders (Carhart-Harris, Bolstridge, et al., 2016; Griffiths et al., 2016; Grob et al., 2011; Palhano-Fontes et al., 2019; Ross et al., 2016; Sanches et al., 2016). By which mechanisms may ayahuasca mediate changes in interoception, affect, and self-referential processes? Hubs of the salience network, such as the insula and the anterior cingulate, have been consistently associated with emotional processing (Craig, 2009; Critchley and Harrison, 2013; Etkin et al.,

2011; Ochsner and Gross, 2005; Seeley et al., 2007; Touroutoglou et al., 2012) and dysfunctions in these regions underlie depression and anxiety in various affective disorders (Williams, 2016). Increased connectivity in the salience network has been associated with early heightened emotional contagion in preclinical Alzheimer's disease (Fredericks et al., 2018; Sturm et al., 2013), while widespread salience network functional and structural degeneration is observed in behavioral variant frontotemporal dementia, a neurodegenerative disease characterized by loss of empathy, socioemotional symptoms, and autonomic dysfunctions (Rankin et al., 2006; Seeley et al., 2012; Sturm, Sible, et al., 2018). Based on these studies, the salience network is believed to support socioemotional-autonomic processing through its interoceptive afferents in the anterior insula processing autonomic activity streams regarding the "moment-to-moment" condition of the body (Craig, 2009; Critchley and Harrison, 2013; Uddin, 2015; Zhou and Seeley, 2014). The anterior cingulate cortex subsequently receives integrated anterior insula input and serves to mobilize visceromotor responses to salient socioemotional stimuli in order to guide behavior (Craig, 2009; Critchley and Harrison, 2013; Uddin, 2015; Zhou and Seeley, 2014). Critically, our findings of subacute default mode network functional connectivity decreases with ayahuasca are in contrast with a previous study reporting subacute default mode network connectivity increases with psilocybin in treatment-resistant depression (Carhart-Harris et al., 2017). Previous works have reported both default mode network connectivity increases and decreases in major depression (Berman et al., 2011; Greicius et al., 2007; Sheline et al., 2009; Yan et al., 2019), with heightened connectivity being associated with altered self-referential thoughts such as rumination and negative internal representations (Berman et al., 2011; Sheline et al., 2009). Although in healthy subjects, our findings provide preliminary evidence that ayahuasca may have a sustained dampening on functional connectivity of systems involved in self-referential processes associated with characteristic symptoms of depression (Brewer et al., 2013; Sheline et al., 2009). We propose that future studies combining longitudinal tf-fMRI and autonomic recordings in healthy and neuropsychiatric

populations could shed light on the acute and long-term impact of psychedelic agents on brain networks supporting interoceptive, affective, and self-referential processes.

*Limitations.* An important limitation of our study consists of the use of liberal voxel-wise statistical thresholds when assessing group differences in subacute functional connectivity across distinct brain networks. Recent research has shown that liberal cluster-extend thresholds are prone to inflate false-positive results, questioning the validity of weakly significant neuroimaging findings (Eklund et al., 2016). The low power attained in our study may have been caused by the small number of participants involved in the study and by the moderate strength of the MRI scanner (1.5 Tesla). Further, weak effects on functional connectivity were to expect after a single ayahuasca session in a sample of cognitively healthy participants, urging for future studies implementing repeated sessions and the inclusion of neuropsychiatric populations. However, we performed several control analyses in order to mitigate methodological and statistical concerns. First, we assessed the reliability of our findings by controlling for the used methodological approach, which revealed similar functional connectivity changes when comparing findings from the seed-based versus ICA approach. Finally, in order to address concerns related to the liberal statistical threshold, we applied nonparametric permutation tests replicating the main findings in this study. Second, we assessed the impact of head movement on the association between altered states of consciousness and subacute functional connectivity changes through the use of partial correlation coefficients. These analyses revealed that head movement, a common confounder in tf-fMRI studies, did not impact our findings. However, findings of decreased functional connectivity in the default mode network need to be interpreted with a grain of salt, since these did not survive more stringent statistical thresholds. Further, the volition subscale of the HRS has been shown to have a low internal consistency (Riba, Rodrı, et al., 2001) advising caution in interpreting the association between altered acute levels in the volition scale and subacute default mode network functional connectivity decreases induced by ayahuasca.

## Conclusions

Psychedelic substances have sustained effects on mood, affect, and self-referential processes in healthy and clinical populations days to weeks after dosing. The novelty of our study resides in elucidating the subacute effects of the psychedelic ayahuasca on functional organization of the salience network and default mode network, two brain systems distinctly involved in interoceptive, affective, and self-referential functions. While primary sensory networks did not show subacute changes in functional connectivity, increased functional connectivity of the salience network one day after the session with ayahuasca related to altered acute somesthesia levels, while decreases in default mode network functional connectivity related to altered levels of volition. Our findings suggest that ayahuasca may have long-lasting effects on affect and mood by modulating those neural circuits supporting interoceptive, affective, and self-referential functions.

## Acknowledgments

L.P. was supported by the German Academic Foundation. The study was funded by the Brazilian federal agencies CNPq (grants #466760/2014 & #479466/2013) and CAPES (grants #1677/2012 & #1577/2013).

## Financial Disclosures

The authors have no conflict of interest to declare.

## References

- Allen EA, Erhardt EB, Damaraju E, et al. (2011) A baseline for the multivariate comparison of resting-state networks. *Frontiers in systems neuroscience* 5: 2.
- Barker SA (2018) N, N-Dimethyltryptamine (DMT), an Endogenous Hallucinogen: Past, Present, and Future Research to Determine Its Role and Function. *Frontiers in neuroscience* 12: 536.



- Behzadi Y, Restom K, Liao J, et al. (2007) A component based noise correction method (CompCor) for BOLD and perfusion based fMRI. *NeuroImage* 37(1): 90–101.
- Beliveau V, Ganz M, Feng L, et al. (2017) A High-Resolution In Vivo Atlas of the Human Brain's Serotonin System. *The Journal of Neuroscience* 37(1): 120–128.
- Berman MG, Peltier S, Nee DE, et al. (2011) Depression, rumination and the default network. *Social cognitive and affective neuroscience* 6(5): 548–555.
- Bouso JC, Palhano-Fontes F, Rodríguez-Fornells A, et al. (2015) Long-term use of psychedelic drugs is associated with differences in brain structure and personality in humans. *European Neuropsychopharmacology* 25(4): 483–492.
- Brewer J, Garrison K and Whitfield-Gabrieli S (2013) What about the 'self' is processed in the posterior cingulate cortex? *Frontiers in human neuroscience* 7: 647.
- Buckner RL, Andrews-Hanna JR and Schacter DL (2008) The brain's default network: anatomy, function, and relevance to disease. *Annals of the New York Academy of Sciences* 1124: 1–38.
- Calhoun VD, Adali T, Pearlson G, et al. (2001) Group ICA of functional MRI data: separability, stationarity, and inference. In: *Proc. Int. Conf. on ICA and BSS*, 2001.
- Carhart-Harris RL, Erritzoe D, Williams T, et al. (2012) Neural correlates of the psychedelic state as determined by fMRI studies with psilocybin. *Proceedings of the National Academy of Sciences* 109(6): 2138–2143.
- Carhart-Harris RL, Leech R, Erritzoe D, et al. (2013) Functional connectivity measures after psilocybin inform a novel hypothesis of early psychosis. *Schizophrenia bulletin* 39(6): 1343–1351.
- Carhart-Harris RL, Muthukumaraswamy S, Roseman L, et al. (2016) Neural correlates of the LSD experience revealed by multimodal neuroimaging. *Proceedings of the National Academy of Sciences*: 2–7.
- Carhart-Harris RL, Bolstridge M, Rucker J, et al. (2016) Psilocybin with psychological support for treatment-resistant depression: an open-label feasibility study. *The Lancet Psychiatry* 3(7): 619–627.
- Carhart-Harris RL, Roseman L, Bolstridge M, et al. (2017) Psilocybin for treatment-resistant depression: fMRI-measured brain mechanisms. *Scientific reports* 7(1): 13187.
- Craig ADB (2009) How do you feel--now? The anterior insula and human awareness. *Nature reviews. Neuroscience* 10(1): 59–70.
- Critchley HD and Harrison NA (2013) Visceral influences on brain and behavior. *Neuron* 77(4): 624–638.
- De Araujo DB, Ribeiro S, Cecchi GA, et al. (2012) Seeing with the eyes shut: Neural basis of enhanced imagery following ayahuasca ingestion. *Human brain mapping* 33(11): 2550–2560.
- Dos Santos RG, Balthazar FM, Bouso JC, et al. (2016) The current state of research on

- ayahuasca: A systematic review of human studies assessing psychiatric symptoms, neuropsychological functioning, and neuroimaging. *Journal of psychopharmacology* 30(12): 1230–1247.
- Eklund A, Nichols TE and Knutsson H (2016) Cluster failure: Why fMRI inferences for spatial extent have inflated false-positive rates. *Proceedings of the National Academy of Sciences* 113(28): 7900–7905.
- Etkin A, Egner T and Kalisch R (2011) Emotional processing in anterior cingulate and medial prefrontal cortex. *Trends in cognitive sciences* 15(2): 85–93.
- Fan L, Li H, Zhuo J, et al. (2016) The Human Brainnetome Atlas: A New Brain Atlas Based on Connectional Architecture. *Cerebral cortex* 26(8): 3508–3526.
- Fontanilla D, Johannessen M, Hajipour AR, et al. (2009) The hallucinogen N,N-dimethyltryptamine (DMT) is an endogenous sigma-1 receptor regulator. *Science* 323(5916): 934–937.
- Fox MD, Snyder AZ, Vincent JL, et al. (2005) The human brain is intrinsically organized into dynamic, anticorrelated functional networks. *Proceedings of the National Academy of Sciences* 102(27): 9673–9678.
- Fredericks CA, Sturm VE, Brown JA, et al. (2018) Early affective changes and increased connectivity in preclinical Alzheimer's disease. *Alzheimer's & Dementia* 10: 471–479.
- Goodman N (2002) The serotonergic system and mysticism: could LSD and the nondrug-induced mystical experience share common neural mechanisms? *Journal of psychoactive drugs* 34(3): 263–272.
- Gorgolewski KJ, Varoquaux G, Rivera G, et al. (2015) NeuroVault.org: a web-based repository for collecting and sharing unthresholded statistical maps of the human brain. *Frontiers in neuroinformatics* 9: 8.
- Grayson DS and Fair DA (2017) Development of large-scale functional networks from birth to adulthood: A guide to the neuroimaging literature. *NeuroImage* 160: 15–31.
- Greicius MD, Flores BH, Menon V, et al. (2007) Resting-State Functional Connectivity in Major Depression: Abnormally Increased Contributions from Subgenual Cingulate Cortex and Thalamus. *Biological psychiatry* 62(5): 429–437.
- Griffiths RR, Johnson MW, Richards WA, et al. (2011) Psilocybin occasioned mystical-type experiences: immediate and persisting dose-related effects. *Psychopharmacology* 218(4): 649–665.
- Griffiths RR, Johnson MW, Carducci MA, et al. (2016) Psilocybin produces substantial and sustained decreases in depression and anxiety in patients with life-threatening cancer: A randomized double-blind trial. *Journal of psychopharmacology* 30(12): 1181–1197.
- Grob CS, Danforth AL, Chopra GS, et al. (2011) Pilot Study of Psilocybin Treatment for Anxiety in Patients With Advanced-Stage Cancer. *Archives of general psychiatry* 68(1): 71.
- Lebedev AV, Lövdén M, Rosenthal G, et al. (2015) Finding the self by losing the self: Neural correlates of ego-dissolution under psilocybin. *Human brain mapping* 36(8): 3137–3153.

- Lebedev AV, Kaelen M, Lövdén M, et al. (2016) LSD-induced entropic brain activity predicts subsequent personality change. *Human brain mapping* 37(9): 3203–3213.
- Lyvers M and Meester M (2012) Illicit use of LSD or psilocybin, but not MDMA or nonpsychedelic drugs, is associated with mystical experiences in a dose-dependent manner. *Journal of psychoactive drugs* 44(5): 410–417.
- Mckenna DJ, Towers GHN and Abbott F (1984) Monoamine-Oxidase Inhibitors in South-American Hallucinogenic Plants - Tryptamine and Beta-Carboline Constituents of Ayahuasca. *Journal of ethnopharmacology* 10(2): 195–223.
- Menon V and Uddin LQ (2010) Saliency, switching, attention and control: a network model of insula function. *Brain structure & function* 214(5-6): 655–667.
- Mizumoto S, da Silveira DX, Barbosa PCR, et al. (2011) Hallucinogen Rating Scale ( HRS ) – Versão brasileira : tradução e adaptação transcultural Hallucinogen Rating Scale ( HRS ) – A Brazilian version : translation and cross-cultural adaptation. *Rev Psiq Clin.* 38(6): 231–237.
- Nichols DE (2016) Psychedelics. *Pharmacological reviews* 68(2): 264–355.
- Ochsner KN and Gross JJ (2005) The cognitive control of emotion. *Trends in cognitive sciences* 9(5): 242–249.
- Osório F de L, Sanches RF, Macedo LR, et al. (2015) Antidepressant effects of a single dose of ayahuasca in patients with recurrent depression: a preliminary report. *Brazilian Journal of Psychiatry* 37(1): 13–20.
- Palhano-Fontes F, Andrade KC, Tofoli LF, et al. (2015) The psychedelic state induced by Ayahuasca modulates the activity and connectivity of the Default Mode Network. *PloS one* 10(2).
- Palhano-Fontes F, Barreto D, Onias H, et al. (2019) Rapid antidepressant effects of the psychedelic ayahuasca in treatment-resistant depression: a randomized placebo-controlled trial. *Psychological Medicine* 49(4): 655–663.
- Pasquini L, Scherr M, Tahmasian M, et al. (2015) Link between hippocampus' raised local and eased global intrinsic connectivity in AD. *Alzheimer's & Dementia* 11(5): 475–484.
- Petri G, Expert P, Turkheimer F, et al. (2014) Homological scaffolds of brain functional networks. *Journal of the Royal Society* 11(101): 20140873.
- Power JD, Barnes KA, Snyder AZ, et al. (2012) Spurious but systematic correlations in functional connectivity MRI networks arise from subject motion. *NeuroImage* 59(3): 2142–2154.
- Raichle ME (2015) The brain's default mode network. *Annual review of neuroscience* 38: 433–447.
- Raichle ME, MacLeod AM, Snyder AZ, et al. (2001) A default mode of brain function. *Proceedings of the National Academy of Sciences* 98(2): 676–682.
- Rankin KP, Gorno-Tempini ML, Allison SC, et al. (2006) Structural anatomy of empathy in

- neurodegenerative disease. *Brain* 129(11): 2945–2956.
- Riba J, Rodri A, Strassman RJ, et al. (2001) Psychometric Assessment of the Hallucinogen Rating Scale. *Drug Alcohol Depend* 62: 215–223.
- Riba J, Rodríguez-Fornells A, Urbano G, et al. (2001) Subjective effects and tolerability of the South American psychoactive beverage Ayahuasca in healthy volunteers. *Psychopharmacology* 154(1): 85–95.
- Riba J, Anderer P, Jané F, et al. (2004) Effects of the South American psychoactive beverage ayahuasca on regional brain electrical activity in humans: a functional neuroimaging study using low-resolution electromagnetic tomography. *Neuropsychobiology* 50(1): 89–101.
- Roseman L, Leech R, Feilding A, et al. (2014) The effects of psilocybin and MDMA on between-network resting state functional connectivity in healthy volunteers. *Frontiers in human neuroscience* 8: 204.
- Ross S, Bossis A, Guss J, et al. (2016) Rapid and sustained symptom reduction following psilocybin treatment for anxiety and depression in patients with life-threatening cancer: a randomized controlled trial. *Journal of psychopharmacology* 30(12): 1165–1180.
- Sampedro F, de la Fuente Revenga M, Valle M, et al. (2017) Assessing the psychedelic ‘ after-glow ’ in ayahuasca users: post-acute neurometabolic and functional connectivity changes are associated with enhanced mindfulness capacities. *Int. J. Neuropsychopharmacol.* 20(9): 698–711.
- Sanches RF, de Lima Osório F, Dos Santos RG, et al. (2016) Antidepressant Effects of a Single Dose of Ayahuasca in Patients With Recurrent Depression: A SPECT Study. *Journal of clinical psychopharmacology* 36(1): 77–81.
- Satterthwaite TD, Wolf DH, Loughhead J, et al. (2012) Impact of in-scanner head motion on multiple measures of functional connectivity: relevance for studies of neurodevelopment in youth. *NeuroImage* 60(1): 623–632.
- Seeley WW, Menon V, Schatzberg AF, et al. (2007) Dissociable intrinsic connectivity networks for salience processing and executive control. *The Journal of Neuroscience* 27(9): 2349–2356.
- Seeley WW, Zhou J and Kim E-J (2012) Frontotemporal dementia: what can the behavioral variant teach us about human brain organization? *The Neuroscientist* 18(4): 373–385.
- Sheline YI, Barch DM, Price JL, et al. (2009) The default mode network and self-referential processes in depression. *Proceedings of the National Academy of Sciences* 106(6): 1942–1947.
- Smith SM and Nichols TE (2009) Threshold-free cluster enhancement: addressing problems of smoothing, threshold dependence and localisation in cluster inference. *NeuroImage* 44(1): 83–98.
- Smith SM, Fox PT, Miller KL, et al. (2009) Correspondence of the brain’s functional architecture during activation and rest. *Proceedings of the National Academy of Sciences* 106(31): 13040–13045.

- Strassman RJ, Qualls CR, Uhlenhuth EH, et al. (1994) Dose-response study of N,N-dimethyltryptamine in humans: II. Subjective effects and preliminary results of a new rating scale. *Archives of general psychiatry* 51(2): 98–108.
- Sturm VE, Yokoyama JS, Seeley WW, et al. (2013) Heightened emotional contagion in mild cognitive impairment and Alzheimer's disease is associated with temporal lobe degeneration. *Proceedings of the National Academy of Sciences* 110(24): 9944–9949.
- Sturm VE, Brown JA, Hua AY, et al. (2018) Network Architecture Underlying Basal Autonomic Outflow: Evidence from Frontotemporal Dementia. *The Journal of Neuroscience* 38(42): 8943–8955.
- Sturm VE, Sible IJ, Datta S, et al. (2018) Resting parasympathetic dysfunction predicts prosocial helping deficits in behavioral variant frontotemporal dementia. *Cortex* 109: 141–155.
- Tagliazucchi E, Roseman L, Kaelen M, et al. (2016) Increased Global Functional Connectivity Correlates with LSD-Induced Ego Dissolution. *Current biology: CB* 26(8): 1043–1050.
- Touroutoglou A, Hollenbeck M, Dickerson BC, et al. (2012) Dissociable large-scale networks anchored in the right anterior insula subserve affective experience and attention. *NeuroImage* 60(4): 1947–1958.
- Trichter S, Klimo J and Krippner S (2009) Changes in Spirituality Among Ayahuasca Ceremony Novice Participants. *Journal of psychoactive drugs* 41(2): 121–134.
- Tzourio-Mazoyer N, Landeau B, Papathanassiou D, et al. (2002) Automated anatomical labeling of activations in SPM using a macroscopic anatomical parcellation of the MNI MRI single-subject brain. *NeuroImage* 15(1): 273–289.
- Uddin LQ (2015) Salience processing and insular cortical function and dysfunction. *Nature reviews. Neuroscience* 16(1): 55–61.
- van den Heuvel MP and Hulshoff Pol HE (2010) Exploring the brain network: A review on resting-state fMRI functional connectivity. *European neuropsychopharmacology* 20(8): 519–534.
- Viol A, Palhano-Fontes F, Onias H, et al. (2017) Shannon entropy of brain functional complex networks under the influence of the psychedelic Ayahuasca. *Scientific reports* 7(1): 7388.
- Viol A, Palhano-Fontes F, Onias H, et al. (2019) Characterizing complex networks using Entropy-degree diagrams: unveiling changes in functional brain connectivity induced by Ayahuasca. *Entropy*. Available at: <https://www.mdpi.com/1099-4300/21/2/128>.
- Vollenweider FX, Leenders KL, Scharfetter C, et al. (1997) Positron emission tomography and fluorodeoxyglucose studies of metabolic hyperfrontality and psychopathology in the psilocybin model of psychosis. *Neuropsychopharmacology* 16(5): 357–372.
- Whitfield-Gabrieli S and Nieto-Castanon A (2012) Conn: a functional connectivity toolbox for correlated and anticorrelated brain networks. *Brain connectivity* 2(3): 125–141.
- Williams LM (2016) Precision psychiatry: a neural circuit taxonomy for depression and anxiety. *The Lancet Psychiatry* 3(5): 472–480.

Winkler AM, Ridgway GR, Webster MA, et al. (2014) Permutation inference for the general linear model. *NeuroImage* 92: 381–397.

Yan C-G, Chen X, Li L, et al. (2019) Reduced default mode network functional connectivity in patients with recurrent major depressive disorder. *Proceedings of the National Academy of Sciences* 116(18): 9078–9083.

Zhou J and Seeley WW (2014) Network dysfunction in Alzheimer’s disease and frontotemporal dementia: implications for psychiatry. *Biological psychiatry* 75(7): 565–573.

## Tables

|                                                                             | <b>Ayahuasca<br/>(N = 22)</b> | <b>Placebo<br/>(N = 21)</b> | <b>t</b>              | <b>p</b> |
|-----------------------------------------------------------------------------|-------------------------------|-----------------------------|-----------------------|----------|
| <b>Age (s.d.) in years</b>                                                  | 30.8 (8.4)                    | 31.0 (10.5)                 | 0.06                  | 0.95     |
| <b>Gender (F/M)</b>                                                         | 12/10                         | 11/10                       | 0.02 <sup>&amp;</sup> | 0.89     |
| <b>Before dosing - mean<br/>framewise head<br/>displacement (s.d) in mm</b> | 0.14 (0.03)                   | 0.13 (0.05)                 | 0.56                  | 0.57     |
| <b>After dosing - mean<br/>framewise head<br/>displacement (s.d) in mm</b>  | 0.15 (0.05) <sup>A</sup>      | 0.14 (0.05) <sup>B</sup>    | 1.01                  | 0.31     |

**Table 1. Sample characteristics.** <sup>&</sup>Chi-square statistics, chi-square test used to test group differences in gender distribution. Paired t-test used to test differences in head motion between the first and second sessions: <sup>A</sup>t = 1.43, p = 0.17; <sup>B</sup>t = 0.41, p = 0.69.

| <b>Mean (s.d.)</b> | <b>Ayahuasca</b> | <b>Placebo</b> | <b>t</b> | <b>p</b> |
|--------------------|------------------|----------------|----------|----------|
| <b>Somesthesia</b> | 1.0 (0.6)        | 0.2 (0.1)      | 6.3      | < 0.0005 |
| <b>Affect</b>      | 0.9 (0.6)        | 0.4 (0.2)      | 3.6      | < 0.005  |
| <b>Perception</b>  | 1.2 (0.6)        | 0.0 (0.1)      | 10.0     | < 0.0005 |
| <b>Cognition</b>   | 0.9 (0.6)        | 0.1 (0.1)      | 6.2      | < 0.0005 |
| <b>Volition</b>    | 1.2 (0.5)        | 0.8 (0.5)      | 2.8      | < 0.009  |
| <b>Intensity</b>   | 2.4 (0.9)        | 0.5 (0.4)      | 8.9      | < 0.0005 |

**Table 2. Hallucinogenic rating scale (HRS).** Subscales assessed during the ayahuasca/placebo sessions.

## Figures and Legends

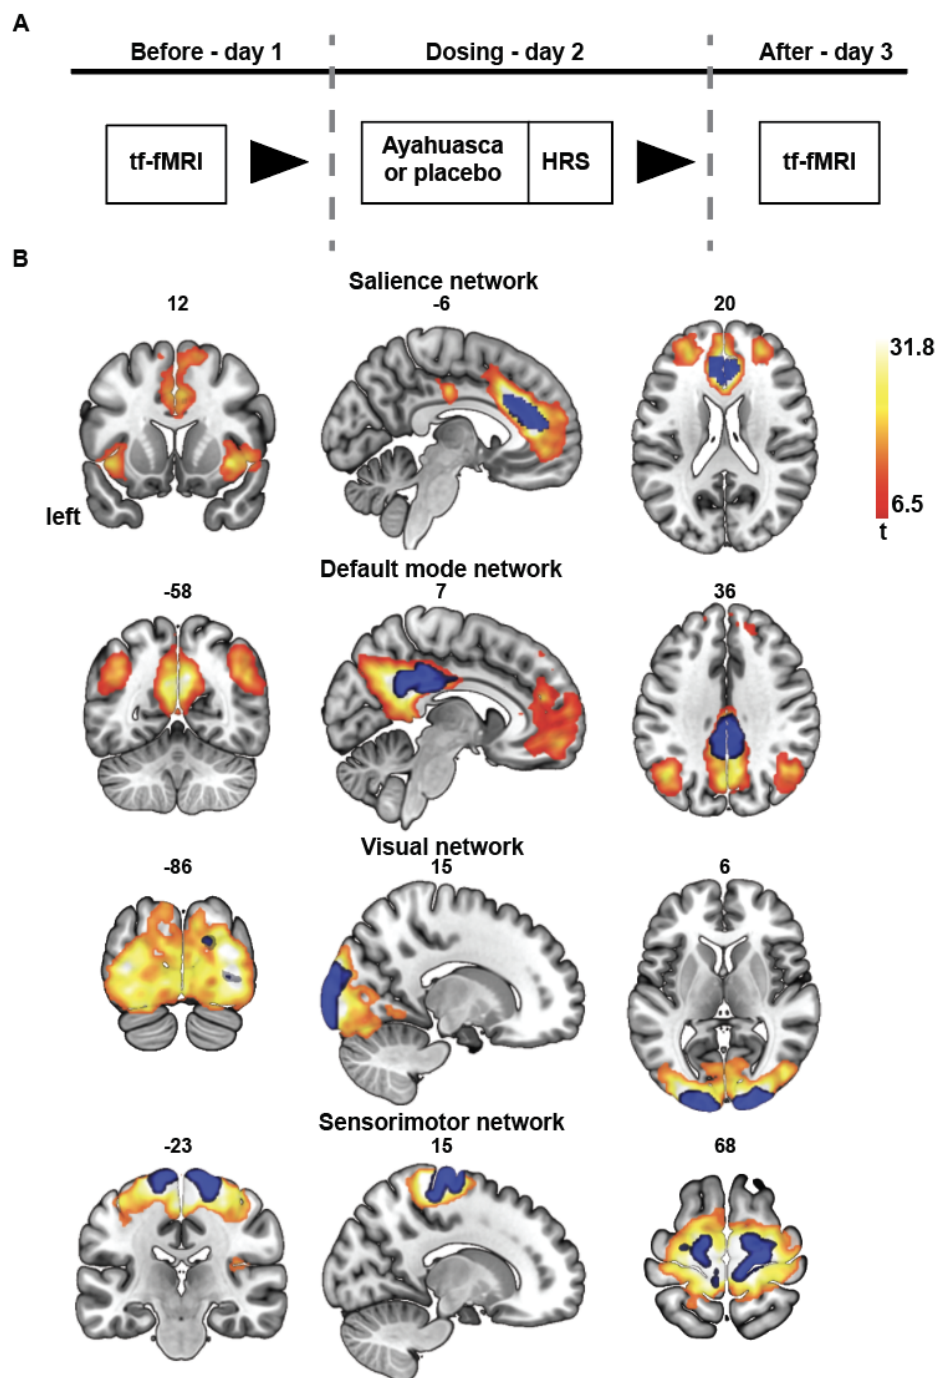

**Figure 1. Study pipeline.** (A) Participants were randomly assigned to the placebo (n=21; 1 ml/kg of ayahuasca adjusted to contain 0.36 mg/kg of DMT) or ayahuasca group (n=22; 1 ml/kg of a placebo). Subscales of the Hallucinogenic Rating Scale (HRS) were assessed during the acute effects of ayahuasca/placebo. All participants were assessed with tf-fMRI one day before and one day after dosing. (B) Map of the salience, default mode, visual, and sensorimotor networks at baseline overlaid onto the MNI template (warm colors; extent probability threshold



of  $p < 0.01$  FWE corrected, voxel-wise threshold of  $p < 0.001$  FWE corrected for multiple comparisons). Individual brain network maps were derived by seeding bilateral region-of-interest (in blue). Left is on the left, bar reflects t-values.

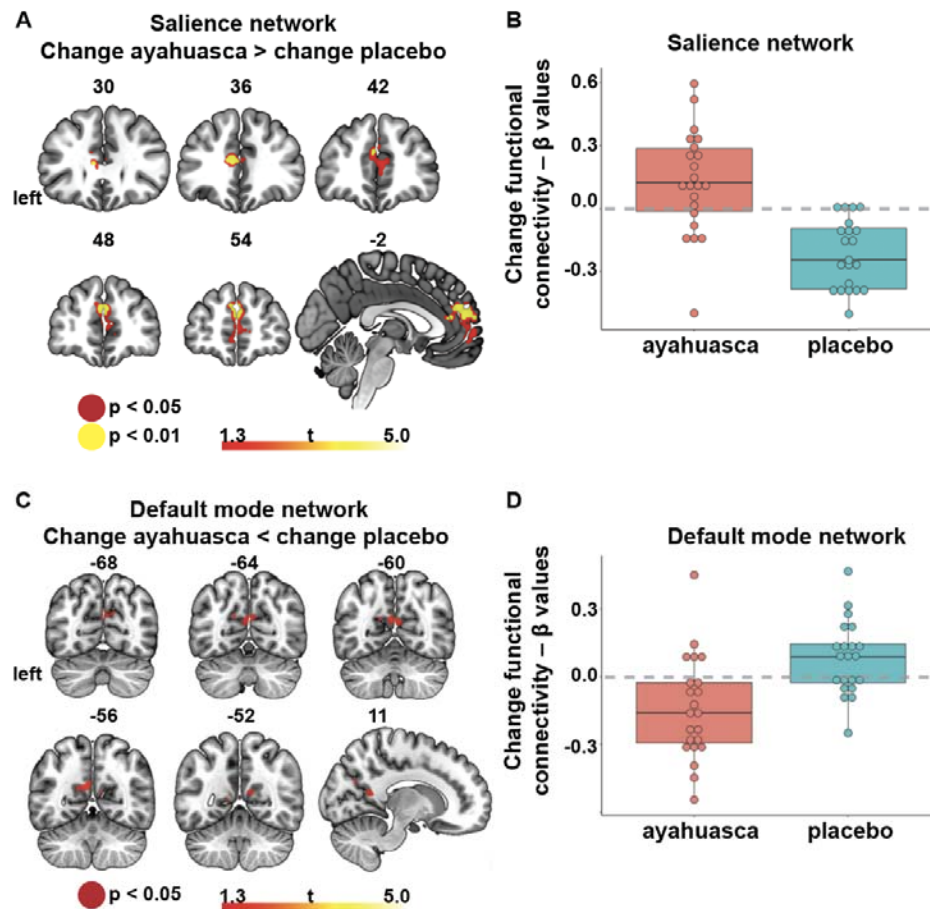

**Figure 2. Functional connectivity changes.** (A) Significant salience network functional connectivity increases in the anterior cingulate cortex for the ayahuasca compared to the placebo group. Joint extent and cluster probability thresholds of  $p < 0.05$  (red) and  $p < 0.01$  (yellow). Left is on the left, bar reflects t-values. (B) Box plot schematizing group differences in functional connectivity (average functional connectivity levels derived from the cluster identified in panel A with a joint cluster and extent probability thresholds of  $p < 0.01$ ). (C) Significant default mode network functional connectivity decreases in the posterior cingulate cortex for the ayahuasca compared to the placebo group. Joint cluster and extent probability thresholds of  $p < 0.05$  (red). Left is on the left, bar reflects t-values. (D) Box plot schematizing group differences in functional connectivity (average functional connectivity levels derived from the cluster identified in panel C with a joint cluster and extent probability thresholds of  $p < 0.05$ ).

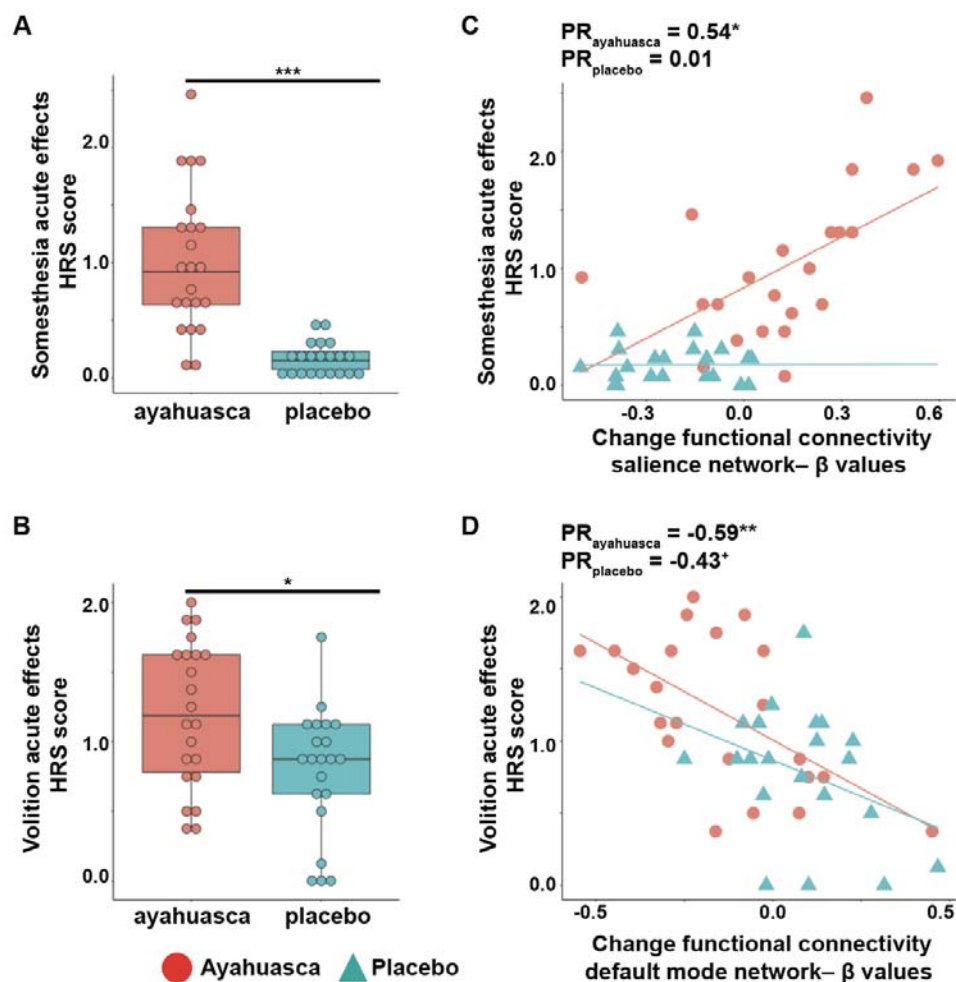

**Figure 3. Ayahuasca induced subacute changes in functional connectivity correlate with altered somesthesia and volition.** Boxplot showing group differences in **(A)** somesthesia and **(B)** volition assessed with the HRS during the acute effects of ayahuasca (in red) and placebo (in cyan). Scatter plots and partial correlation coefficients corrected for the difference in framewise head displacement between the second and first scan associating **(C)** somesthesia or **(D)** volition with averaged levels of functional connectivity changes identified in the salience network and default mode network (ayahuasca red circles and line, placebo cyan triangles and line).  $^+p < 0.01$ ,  $*p < 0.01$ ,  $**p < 0.005$ ,  $***p < 0.0005$ .
